# Supplementary material for: Identifying changes in immune cells and constructing prognostic models using immune-related genes in post-burn immunosuppression
Source: PeerJ. 2022 Jan 13;10:e12680. doi: 10.7717/peerj.12680 (PMC8761370; doi:10.7717/peerj.12680)
Supplement: Supplemental Information 3 [file peerj-10-12680-s003.xlsx]

## Sheet: Sheet1
ΔΔct（average）	Samples	Genes
0.996	sample1_normal	NFATC2
0.446	sample1_normal	RORA
0.814	sample1_normal	CAMK2D
1.332	sample1_normal	CAMK4
2.09	sample1_normal	miR-212-3p
0.67	sample2_normal	NFATC2
0.23	sample2_normal	RORA
1.014	sample2_normal	CAMK2D
1.47	sample2_normal	CAMK4
2.314	sample2_normal	miR-212-3p
0.436	sample3_normal	NFATC2
0.39	sample3_normal	RORA
1.23	sample3_normal	CAMK2D
1.494	sample3_normal	CAMK4
2.312	sample3_normal	miR-212-3p
0.47	sample4_normal	NFATC2
0.706	sample4_normal	RORA
1.214	sample4_normal	CAMK2D
0.616	sample4_normal	CAMK4
1.872	sample4_normal	miR-212-3p
0.846	sample5_normal	NFATC2
0.312	sample5_normal	RORA
0.806	sample5_normal	CAMK2D
0.824	sample5_normal	CAMK4
1.788	sample5_normal	miR-212-3p
0.806	sample6_normal	NFATC2
0.41	sample6_normal	RORA
0.79	sample6_normal	CAMK2D
1.198	sample6_normal	CAMK4
2.442	sample6_normal	miR-212-3p
2.19	sample7_burn	NFATC2
2.666	sample7_burn	RORA
2.19	sample7_burn	CAMK2D
2.19	sample7_burn	CAMK4
1.956	sample7_burn	miR-212-3p
2.506	sample8_burn	NFATC2
2.506	sample8_burn	RORA
2.506	sample8_burn	CAMK2D
2.506	sample8_burn	CAMK4
2.312	sample8_burn	miR-212-3p
1.89	sample9_burn	NFATC2
1.804	sample9_burn	RORA
1.89	sample9_burn	CAMK2D
1.89	sample9_burn	CAMK4
2.414	sample9_burn	miR-212-3p
1.75	sample12_burn	NFATC2
1.95	sample12_burn	RORA
1.75	sample12_burn	CAMK2D
1.4	sample12_burn	CAMK4
2.476	sample12_burn	miR-212-3p
2.47	sample11_burn	NFATC2
2.47	sample11_burn	RORA
2.47	sample11_burn	CAMK2D
2.47	sample11_burn	CAMK4
1.586	sample11_burn	miR-212-3p
1.974	sample10_burn	NFATC2
1.636	sample10_burn	RORA
1.974	sample10_burn	CAMK2D
1.974	sample10_burn	CAMK4
1.796	sample10_burn	miR-212-3p
